# Supplementary material for: Differential Expression of PD-L1 between Primary and Metastatic Sites in Clear-Cell Renal Cell Carcinoma
Source: Oxford University Press journal article supplement (doi:10.1158/2326-6066.cir-15-0043), 2015-05-27
Supplement: 23266066cir150043-sup-145055_1_supp_2940757_nmv86n.docx [file 23266066cir150043-sup-145055_1_supp_2940757_nmv86n.docx]

Supplemental Table 1. Time interval between the resection of the primary tumor and the resection of each metastatic lesion. The discordance in PD-L1 expression between the primary tumor and each metastasis is also noted.

| **Case**  **#** | **Mets #** | **<3**  **months** | **3-6**  **months** | **6-12 months** | **>12 months** | **Discordant PD-L1 expression with primary tumor** |
| --- | --- | --- | --- | --- | --- | --- |
| 1 | #1 | - | - | - | X | - |
|  | #2 | - | - | - | X | - |
|  | #3 | - | - | - | X | - |
|  | #4 | - | - | - | X | - |
| 2 | #1 | - | - | X | - | - |
| 3 | #1 | X | - | - | - | X |
| 4 | #1 | X | - | - | - | X |
| 5 | #1 | X | - | - | - | - |
| 6 | #1 | X | - | - | - | - |
| 7 | #1 | X | - | - | - | - |
| 8 | #1 | X | - | - | - | - |
| 9 | #1 | - | - | X | - | - |
| 10 | #1 | - | - | X | - | - |
|  | #2 | - | - | - | X | - |
| 11 | #1 | X | - | - | - | - |
| 12 | #1 | X | - | - | - | - |
| 13 | #1 | X | - | - | - | - |
| 14 | #1 | X | - | - | - | - |
|  | #2 | X | - | - | - | - |
| 15 | #1 | X | - | - | - | - |
| 16 | #1 | X | - | - | - | - |
| 17 | #1 | X | - | - | - | - |
|  | #2 | X | - | - | - | - |
| 18 | #1 | X | - | - | - | - |
| 19 | #1 | X | - | - | - | - |
| 20 | #1 | - | - | - | X | - |
| 21 | #1 | - | - | - | X | - |
| 22 | #1 | X | - | - | - | - |
|  | #2 | X | - | - | - | - |
| 23 | #1 | X | - | - | - | - |
| 24 | #1 | - | - | - | X | X |
| 25 | #1 | X | - | - | - | - |
| 26 | #1 | - | - | X | - | - |
|  | #2 | - | - | - | X | - |
| 27 | #1 | - | - | - | X | - |
| 28 | #1 | X | - | - | - | - |
| 29 | #1 | X | - | - | - | - |
| 30 | #1 | X | - | - | - | - |
| 31 | #1 | X | - | - | - | X |
| 32 | #1 | X | - | - | - | X |
| 33 | #1 | X | - | - | - | - |
| 34 | #1 | - | - | X | - | - |
|  | #2 | - | - | X | - | - |
| 35 | #1 | - | X | - | - | X |
| 36 | #1 | - | - | X | - | - |
|  | #2 | - | - | - | X | - |
|  | #3 | - | - | - | X | - |
| 37 | #1 | X | - | - | - | - |
|  | #2 | - | - | - | X | - |
| 38 | #1 | - | - | - | X | - |
|  | #2 | - | - | - | X | - |
|  | #3 | - | - | - | X | - |
|  | #4 | - | - | - | X | - |
|  | #5 | - | - | - | X | - |
|  | #6 | - | - | - | X | - |
| 39 | #1 | X | - | - | - | - |
| 40 | #1 | X | - | - | - | X |
| 41 | #1 | X | - | - | - | - |
| 42 | #1 | X | - | - | - | X |
| 43 | #1 | - | - | - | X | - |
|  | #2 | - | - | - | X | - |
|  | #3 | - | - | - | X | - |
|  | #4 | - | - | - | X | - |
| 44 | #1 | - | - | - | X | - |
| 45 | #1 | - | X | - | - | - |
| 46 | #1 | - | X | - | - | - |
| 47 | #1 | X | - | - | - | - |
|  | #2 | - | - | X | - | - |
| 48 | #1 | - | - | - | X | X |
| 49 | #1 | - | - | - | X | - |
| 50 | #1 | - | X | - | - | - |
| 51 | #1 | - | - | - | X | - |
|  | #2 | - | - | - | X | - |
| 52 | #1 | - | - | - | X | X |
|  | #2 | - | - | - | X | - |
| 53 | #1 | - | X | - | - | X |

(X) indicates YES, (-) indicates NO.
